# Supplementary material
Source: PubMed Central journal article supplement (PMC9980572)

## SUPPLEMENTARY DIGITAL MATERIAL 2

Supplementary Figure 1.—The positions of the electrodes and the treatment status of the study intervention.

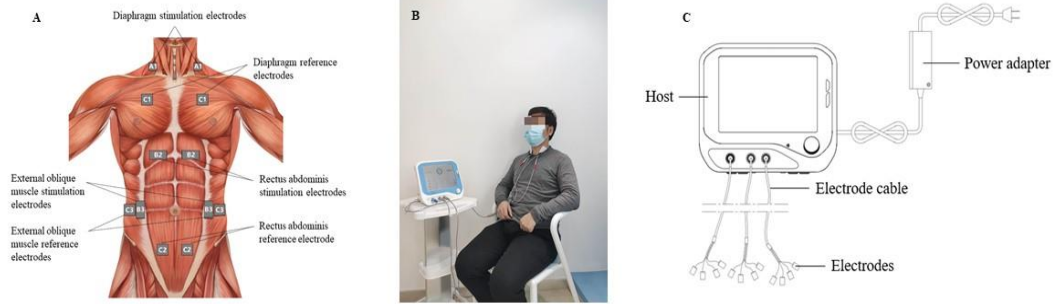

Supplement: Supplementary_Digital_Material2.pdf [file Supplementary_Digital_Material2.pdf]
