# Supplementary material
Source: PubMed Central journal article supplement (PMC9980572)
Supplement: Supplementary_Digital_Material4.pdf [file Supplementary_Digital_Material4.pdf]

SUPPLEMENTARY DIGITAL MATERIAL 4

Supplementary Table I.—Baseline characteristics of GOLD-3 COPD subjects in both groups.

| Variables                                     | Study intervention<br>(N = 48) | control intervention<br>(N = 49) | <i>P</i> |
|-----------------------------------------------|--------------------------------|----------------------------------|----------|
| 6-minute walking distance (m) *               | 425.76 ± 60.00                 | 443.96 ± 52.17                   | 0.114    |
| mMRC                                          |                                |                                  |          |
| mMRC grade1 N (%) †                           | 26(54.17%)                     | 24(48.98%)                       | 0.950    |
| mMRC grade2 N (%) †                           | 16(33.33%)                     | 21(42.86%)                       |          |
| mMRC grade3 N (%) †                           | 6(12.50%)                      | 4(8.16%)                         |          |
| Spirometry                                    |                                |                                  |          |
| FEV <sub>1</sub> (L) *                        | 1.23 ± 0.24                    | 1.18 ± 0.22                      | 0.247    |
| FEV <sub>1</sub> %predicted (%) ‡             | 45.45 (38.09, 48.05)           | 43.00 (38.60, 46.40)             | 0.166    |
| FVC (L) *                                     | 2.56 ± 0.53                    | 2.55 ± 0.54                      | 0.952    |
| FEV <sub>1</sub> / FVC (%) ‡                  | 45.97 (42.42, 55.21)           | 47.20 (41.45, 54.40)             | 0.591    |
| Maxima ventilation volume (L/min) *           | 47.74 ± 13.59                  | 44.69 ± 13.08                    | 0.290    |
| Peak expiratory flow (L/s) *                  | 3.68 ± 1.09                    | 3.48 ± 1.07                      | 0.383    |
| PaCO <sub>2</sub> (mmHg) ‡                    | 40.65(38.30, 42.75)            | 39.00 (37.00, 42.40)             | 0.311    |
| PaO <sub>2</sub> (mmHg) ‡                     | 78.70 (74.75, 85.30)           | 77.70 (73.00, 83.20)             | 0.611    |
| Diaphragm motion in quiet breathing<br>(cm) ‡ | 2.30 ± 0.67                    | 2.26 ± 0.55                      | 0.732    |
| Diaphragm motion in deep breathing<br>(cm) ‡  | 4.59 ± 1.22                    | 4.50 ± 1.00                      | 0.706    |

Data are reported as the mean ± standard deviation, or median (25th centile, 75th centile) unless stated otherwise; \* Independent T-Test or ‡ Wilkison rank test for non-normally distributed data or † Chi-Squared test was used to compare groups.

Abbreviations: FEV<sub>1</sub> = forced expiratory volume in 1 second; FVC = forced vital capacity; mMRC = modified Medical Research Council; Lower scores indicate fewer symptoms; PaCO<sub>2</sub> = partial pressure of carbon dioxide; PaO<sub>2</sub> = partial pressure of oxygen.
