# Supplementary material
Source: PubMed Central journal article supplement (PMC9980572)
Supplement: Supplementary_Digital_Material6.pdf [file Supplementary_Digital_Material6.pdf]

SUPPLEMENTARY DIGITAL MATERIAL 6

Supplementary Table III.—Baseline characteristics of GOLD-4 COPD subjects in both groups.

| Variables                             | Study intervention<br>(N = 12) | control intervention<br>(N = 10) | <i>P</i> |
|---------------------------------------|--------------------------------|----------------------------------|----------|
| 6-minute walking distance (m) *       | 413.30 ± 58.04                 | 419.53 ± 62.68                   | 0.811    |
| mMRC                                  |                                |                                  |          |
| mMRC grade1 N (%) †                   | 5(41.67%)                      | 2(20.00%)                        | 0.604    |
| mMRC grade2 N (%) †                   | 4(33.33%)                      | 6(60.00%)                        |          |
| mMRC grade3 N (%) †                   | 3(25.00%)                      | 2(20.00%)                        |          |
| Spirometry                            |                                |                                  |          |
| FEV <sub>1</sub> (L) *                | 0.83 ± 0.13                    | 0.75 ± 0.12                      | 0.155    |
| FEV <sub>1</sub> %predicted (%) ‡     | 26.40 (25.60, 28.60)           | 23.48 (21.30, 29.20)             | 0.156    |
| FVC (L) *                             | 2.29 ± 0.47                    | 2.01 ± 0.31                      | 0.121    |
| FEV <sub>1</sub> / FVC (%) ‡          | 37.15 (31.30, 42.02)           | 38.98 (31.59, 44.56)             | 0.727    |
| Maxima ventilation volume (L / min) * | 33.35 ± 6.54                   | 30.17 ± 4.25                     | 0.277    |
| Peak expiratory flow (L / s) *        | 2.64 ± 0.61                    | 2.91 ± 0.89                      | 0.401    |
| PaCO <sub>2</sub> (mmHg) ‡            | 42.30 (39.50, 44.45)           | 41.85 (35.20, 44.50)             | 0.757    |
| PaO <sub>2</sub> (mmHg) ‡             | 71.35 (67.70, 75.50)           | 78.90 (73.00, 84.50)             | 0.099    |
| Diaphragm motion in quiet             | 2.09 ± 0.74                    | 2.43 ± 0.84                      | 0.322    |

|                                           |             |             |       |
|-------------------------------------------|-------------|-------------|-------|
| breathing (cm) *                          |             |             |       |
| Diaphragm motion in deep breathing (cm) * | 4.98 ± 1.21 | 4.65 ± 0.65 | 0.441 |

Data are reported as the mean ± standard deviation, or median (25th centile, 75th centile) unless stated otherwise; \* Independent T-Test or ‡ Wilkison rank test for non-normally distributed data or † Chi- Squared test was used to compare groups.

Abbreviations: FEV<sub>1</sub> = forced expiratory volume in 1 second; FVC = forced vital capacity; mMRC = modified Medical Research Council;, Lower scores indicate fewer symptoms; PaCO<sub>2</sub> = partial pressure of carbon dioxide; PaO<sub>2</sub> = partial pressure of oxygen.
