# Supplementary material
Source: PubMed Central journal article supplement (PMC9980572)
Supplement: Supplementary_Digital_Material7.pdf [file Supplementary_Digital_Material7.pdf]

SUPPLEMENTARY DIGITAL MATERIAL 7

Supplementary Table IV.—Adverse Events of participants in both groups.

| Variables                                            | Study intervention<br>(N = 60) | Control<br>intervention<br>(N = 60) |
|------------------------------------------------------|--------------------------------|-------------------------------------|
| Adverse Events, N (%) *                              | 9 (15.00%)                     | 9 (15.00%)                          |
| Adverse Events related to intervention, N (%)        | 0                              | 0                                   |
| Severe Adverse Events, N (%) *                       | 1 (1.67%)                      | 0                                   |
| Severe Adverse Events related to intervention, N (%) | 0                              | 0                                   |
| Adverse Events leading to lost in research           | 0                              | 0                                   |
| Description of symptoms                              |                                |                                     |
| Fever, N (%) *, †                                    | 0                              | 1 (1.67%)                           |
| Catching a cold, N (%) *, ‡                          | 0                              | 1 (1.67%)                           |
| Cough, N (%) *, ‡                                    | 2 (3.34%)                      | 2 (3.33%)                           |
| Chest tightness, N (%) *, †                          | 1 (1.67%)                      | 1 (1.67%)                           |
| Dizziness, N (%) *, †                                | 1 (1.67%)                      | 0                                   |
| Hemoptysis, N (%) *, †                               | 1 (1.67%)                      | 0                                   |
| Lower of percutaneous oxygen saturation, N (%) *, †  | 4 (6.66%)                      | 4 (6.66%)                           |
| Abdominal tension, N (%) *, ‡                        | 1 (1.67%)                      | 0                                   |
| Conjunctivitis, N (%) *, ‡                           | 0                              | 2 (3.33%)                           |
| Erythema in back and legs, N (%) *, §                | 0                              | 1 (1.67%)                           |
| Admitted to hospital because of influenza*, ‡        | 1 (1.67%)                      | 0                                   |

In the table is shown the occurrence of adverse events during intervention. Eight (6.66%) participants were reported lowered PaO<sub>2</sub> levels during the study period, four (6.66%) in the study intervention group, and four (6.66%) in the control intervention group. One participant from the control intervention group were reported persistent erythema, which was probable related to the use of adhesive electrodes. \* $\chi^2$  test was used to compare groups and  $P < 0.05$  between groups analysis; †Adverse events possible not related to intervention; ‡Adverse events not related to intervention; §Adverse events possible not related to intervention.
